# Supplementary material for: LitR directly upregulates autoinducer synthesis and luminescence in Aliivibrio logei
Source: PeerJ. 2021 Sep 21;9:e12030. doi: 10.7717/peerj.12030 (PMC8462370; doi:10.7717/peerj.12030)
Supplement: Supplemental Information 2 — Measurements of luminescence of E. coli cells transformed promoter-reporter plasmids in combination with plasmid carrying litR A. logei gene under control of Plac promoter. Luminescence was used for calculation of induction coeffitients. [file peerj-09-12030-s002.xlsx]

## Sheet: Fig2
REP1	E. coli MG1655 pAFR p15Tc-litR		E. coli MG1655 pALR1 p15Tc-litR		E. coli MG1655 pDewP2rev p15Tc-litR
	Ctrl	Induced 1 mM IPTG	Ctrl	Induced 1 mM IPTG	Ctrl	Induced 1 mM IPTG
OD	lum	lum	lum	lum	lum	lum
0.1	270	270	620	610	6920	6940
0.2	290	300	560	560	6900	6990
0.4	270	560	610	630	5460	6130
0.8	380	1910	840	1270	4650	5800
REP2	E. coli MG1655 pAFR p15Tc-litR		E. coli MG1655 pALR1 p15Tc-litR		E. coli MG1655 pDewP2rev p15Tc-litR
	Ctrl	Induced 1 mM IPTG	Ctrl	Induced 1 mM IPTG	Ctrl	Induced 1 mM IPTG
OD	lum	lum	lum	lum	lum	lum
0.1	300	300	160	160	1160	1160
0.2	370	350	150	150	1200	1190
0.4	400	610	150	160	1320	1250
0.8	450	1190	220	280	1540	1590
REP3	E. coli MG1655 pAFR p15Tc-litR		E. coli MG1655 pALR1 p15Tc-litR		E. coli MG1655 pDewP2rev p15Tc-litR
	Ctrl	Induced 1 mM IPTG	Ctrl	Induced 1 mM IPTG	Ctrl	Induced 1 mM IPTG
OD	lum	lum	lum	lum	lum	lum
0.1	150	150	430	430	1150	1150
0.2	160	160	420	430	1100	1120
0.4	170	310	490	530	1200	1180
0.8	190	1120	670	1190	1800	1540

## Sheet: Fig3
	E. coli MG1655 pSV16 p15Tc-litR		E. coli MG1655 pSV16 p15Tc-lac		E. coli MG1655 pIVA p15Tc-litR		E. coli MG1655 pIVA p15Tc-lac			E. coli MG1655 pAS1 p15Tc-litR		E. coli MG1655 pAS1 p15Tc-lac		E. coli MG1655 pAS2 p15Tc-litR		E. coli MG1655 pAS2 p15Tc-lac			E. coli MG1655 pVFR1 p15Tc-litR		E. coli MG1655 pVFR1 p15Tc-lac
REP1	Ctrl	Induced 1 mM IPTG	Ctrl	Induced 1 mM IPTG	Ctrl	Induced 1 mM IPTG	Ctrl	Induced 1 mM IPTG		Ctrl	Induced 1 mM IPTG	Ctrl	Induced 1 mM IPTG	Ctrl	Induced 1 mM IPTG	Ctrl	Induced 1 mM IPTG		Ctrl	Induced 1 mM IPTG	Ctrl	Induced 1 mM IPTG
OD	lum	lum	lum	lum	lum	lum	lum	lum		lum	lum	lum	lum	lum	lum	lum	lum		lum	lum	lum	lum
0.1	180	180	150	150	70	70	30	30		25	25	20	20	2100	2100	1850	1850		120	120	100	100
0.2	190	780	160	160	90	80	30	30											140	150	130	130
0.4	260	1550	210	220	90	210	40	40		30	40	30	30	1950	3100	1760	1730		150	910	180	180
0.8	350	2410	440	420	110	650	70	70		35	85	50	45	2250	9300	1990	1780		175	3870	240	230
	E. coli MG1655 pSV16 p15Tc-litR		E. coli MG1655 pSV16 p15Tc-lac		E. coli MG1655 pIVA p15Tc-litR		E. coli MG1655 pIVA p15Tc-lac			E. coli MG1655 pAS1 p15Tc-litR		E. coli MG1655 pAS1 p15Tc-lac		E. coli MG1655 pAS2 p15Tc-litR		E. coli MG1655 pAS2 p15Tc-lac			E. coli MG1655 pVFR1 p15Tc-litR		E. coli MG1655 pVFR1 p15Tc-lac
REP2	Ctrl	Induced 1 mM IPTG	Ctrl	Induced 1 mM IPTG	Ctrl	Induced 1 mM IPTG	Ctrl	Induced 1 mM IPTG		Ctrl	Induced 1 mM IPTG	Ctrl	Induced 1 mM IPTG	Ctrl	Induced 1 mM IPTG	Ctrl	Induced 1 mM IPTG		Ctrl	Induced 1 mM IPTG	Ctrl	Induced 1 mM IPTG
OD	lum	lum	lum	lum	lum	lum	lum	lum		lum	lum	lum	lum	lum	lum	lum	lum		lum	lum	lum	lum
0.1	30	30	40	40	20	20	10	10		10	10	15	15	10500	10500	6530	6540		90	100	50	50
0.2	60	270	60	60	25	100	20	20											110	140	70	70
0.4	70	650	70	70	40	230	30	30		10	20	25	25	9500	10900	6120	6090		130	540	90	90
0.8	90	1070	110	100	60	340	90	90		15	35	45	50	7600	14300	8960	8800		170	1760	150	140
	E. coli MG1655 pSV16 p15Tc-litR		E. coli MG1655 pSV16 p15Tc-lac		E. coli MG1655 pIVA p15Tc-litR		E. coli MG1655 pIVA p15Tc-lac			E. coli MG1655 pAS1 p15Tc-litR		E. coli MG1655 pAS1 p15Tc-lac		E. coli MG1655 pAS2 p15Tc-litR		E. coli MG1655 pAS2 p15Tc-lac			E. coli MG1655 pVFR1 p15Tc-litR		E. coli MG1655 pVFR1 p15Tc-lac
REP3	Ctrl	Induced 1 mM IPTG	Ctrl	Induced 1 mM IPTG	Ctrl	Induced 1 mM IPTG	Ctrl	Induced 1 mM IPTG		Ctrl	Induced 1 mM IPTG	Ctrl	Induced 1 mM IPTG	Ctrl	Induced 1 mM IPTG	Ctrl	Induced 1 mM IPTG		Ctrl	Induced 1 mM IPTG	Ctrl	Induced 1 mM IPTG
OD	lum	lum	lum	lum	lum	lum	lum	lum		lum	lum	lum	lum	lum	lum	lum	lum		lum	lum	lum	lum
0.1	150	150	20	20	20	20	30	30		15	15	20	20	1530	1540	2150	2150		350	350	50	50
0.2	140	310	30	30	30	40	30	30											290	400	50	50
0.4	300	1350	50	50	30	120	40	40		25	25	40	40	1680	3940	2200	2300		330	1470	240	240
0.8	550	3100	90	90	50	490	60	50		40	135	70	75	2020	9730	3150	3400		510	7830	300	330

## Sheet: Fig4
	E. coli MG1655 pSV16 p15Tc-litR		E. coli MG1655 pSV16 p15Tc-lac		E. coli MG1655 pR2 p15Tc-litR		E. coli MG1655 pR2 p15Tc-lac		E. coli MG1655 pDlb1 p15Tc-litR		E. coli MG1655 pDlb1 p15Tc-lac		E. coli MG1655 pDlb2 p15Tc-litR		E. coli MG1655 pDlb2 p15Tc-lac
	Ctrl	Induced 1 mM IPTG	Ctrl	Induced 1 mM IPTG	Ctrl	Induced 1 mM IPTG	Ctrl	Induced 1 mM IPTG	Ctrl	Induced 1 mM IPTG	Ctrl	Induced 1 mM IPTG	Ctrl	Induced 1 mM IPTG	Ctrl	Induced 1 mM IPTG
OD	lum	lum	lum	lum	lum	lum	lum	lum	lum	lum	lum	lum	lum	lum	lum	lum
0.1	180	180	150	150	520	490	300	300	180	180	30	30	170	170	50	50
0.2	190	780	160	160	470	940	350	350	230	510	45	40	240	720	60	60
0.4	260	1550	210	220	360	2470	450	450	270	1500	55	50	370	3200	110	120
0.8	350	2410	440	420	420	4710	700	700
	E. coli MG1655 pSV16 p15Tc-litR		E. coli MG1655 pSV16 p15Tc-lac		E. coli MG1655 pR2 p15Tc-litR		E. coli MG1655 pR2 p15Tc-lac		E. coli MG1655 pDlb1 p15Tc-litR		E. coli MG1655 pDlb1 p15Tc-lac		E. coli MG1655 pDlb2 p15Tc-litR		E. coli MG1655 pDlb2 p15Tc-lac
	Ctrl	Induced 1 mM IPTG	Ctrl	Induced 1 mM IPTG	Ctrl	Induced 1 mM IPTG	Ctrl	Induced 1 mM IPTG	Ctrl	Induced 1 mM IPTG	Ctrl	Induced 1 mM IPTG	Ctrl	Induced 1 mM IPTG	Ctrl	Induced 1 mM IPTG
OD	lum	lum	lum	lum	lum	lum	lum	lum	lum	lum	lum	lum	lum	lum	lum	lum
0.1	30	30	40	40	1200	1200	600	610	190	190	150	150	160	160	50	50
0.2	60	270	60	60	1690	3190	590	600	260	560	160	160	230	630	70	70
0.4	70	650	70	70	3390	11050	710	670	280	1500	320	330	290	2250	240	240
0.8	90	1070	110	100	6070	16080	900	750
	E. coli MG1655 pSV16 p15Tc-litR		E. coli MG1655 pSV16 p15Tc-lac		E. coli MG1655 pR2 p15Tc-litR		E. coli MG1655 pR2 p15Tc-lac		E. coli MG1655 pDlb1 p15Tc-litR		E. coli MG1655 pDlb1 p15Tc-lac		E. coli MG1655 pDlb2 p15Tc-litR		E. coli MG1655 pDlb2 p15Tc-lac
	Ctrl	Induced 1 mM IPTG	Ctrl	Induced 1 mM IPTG	Ctrl	Induced 1 mM IPTG	Ctrl	Induced 1 mM IPTG	Ctrl	Induced 1 mM IPTG	Ctrl	Induced 1 mM IPTG	Ctrl	Induced 1 mM IPTG	Ctrl	Induced 1 mM IPTG
OD	lum	lum	lum	lum	lum	lum	lum	lum	lum	lum	lum	lum	lum	lum	lum	lum
0.1	150	150	20	20	140	140	1030	1040	180	180	100	100	160	160	160	160
0.2	140	310	30	30	130	210	1280	1290	230	540	120	120	250	1120	190	190
0.4	300	1350	50	50	160	1170	2260	2250	270	1850	200	200	390	3800	350	340
0.8	550	3100	90	90	370	1730	3150	3090
